# Supplementary material for: NTHL1 Gene Mutations in Polish Polyposis Patients—Weighty Player or Vague Background?
Source: MDPI journal article supplement (doi:10.3390/ijms241914548), 2023-09-26
Supplement: s1 [file s1]

# ***NTHL1* gene mutations in Polish polyposis patients - weighty player or vague background?**

**Natalia Grot<sup>1</sup>, Marta Kaczmarek-Ryś<sup>1</sup>, Emila Lis-Tanaś<sup>1</sup>, Alicja Kryszczyńska<sup>1</sup>, Dorota Nowakowska<sup>2</sup>,  
Anna Jakubiuk-Tomaszuk<sup>3,4</sup>, Jacek Paszkowski<sup>5</sup>, Tomasz Banasiewicz<sup>5</sup>, Szymon Hryhorowicz<sup>1</sup> and  
Andrzej Pławski<sup>1,5</sup> \***

<sup>1</sup> Institute of Human Genetics, Polish Academy of Sciences, Strzeszyńska 32, 60-479 Poznań, Poland; natalia.grot@igcz.poznan.pl (N.G.); marta.kaczmarek-rys@igcz.poznan.pl (M.K.-R.); szymon.hryhorowicz@igcz.poznan.pl (S.H.); emilia.lis@igcz.poznan.pl (E.L.-T.); alicja.kryszczynska@igcz.poznan.pl (A.K.); andp@man.poznan.pl (A.P.)

<sup>2</sup> Cancer Genetics Unit, Cancer Prevention Department, The Maria Skłodowska-Curie National Research Institute of Oncology in Warsaw, Warsaw, Poland, dorota.nowakowska@coi.pl (D.N.) ORCID: 0000-0002-7109-5284

<sup>3</sup> Department of Pediatric Neurology, Medical University of Białystok, Białystok, Poland, anna.jakubiuk@udsk.pl (A. J. T.)

<sup>4</sup> Medical Genetics Unit, Mastermed Medical Center, Białystok, Poland, ajaktom@gmail.com (A. J. T.)

<sup>5</sup> Department of General and Endocrine Surgery and Gastroenterological Oncology, Poznań University of Medical Sciences, Przybyszewskiego 49, 60-355 Poznań, Poland; japaszek@op.pl (J.P.); tbanasiewicz@op.pl (T.B.)

\* Correspondence: andp@man.poznan.pl; Tel.: +48(60)4547635

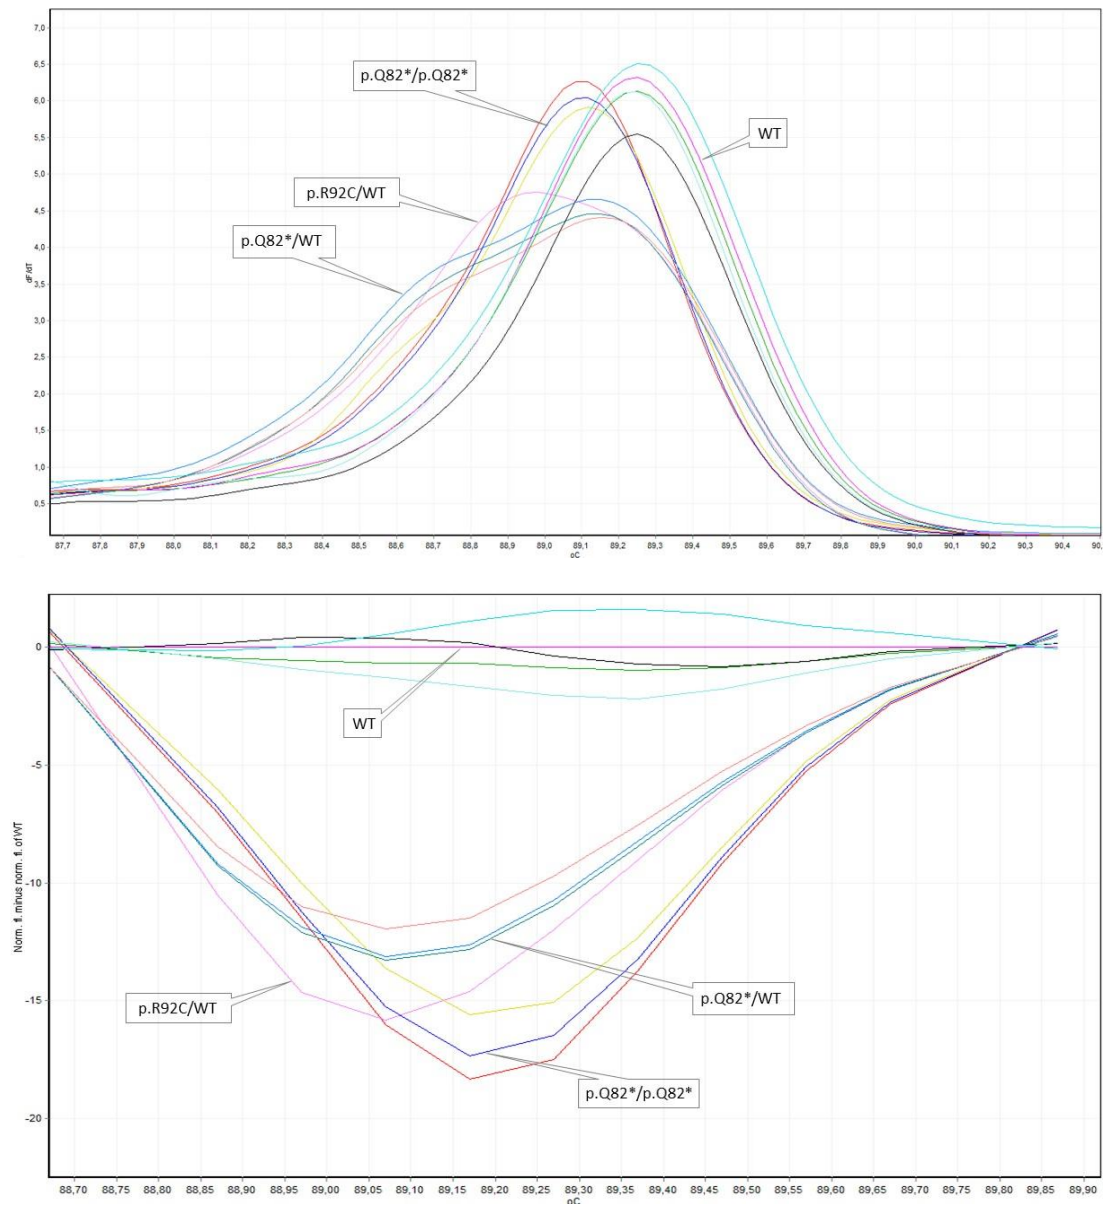

**Figure S1.** Melting profiles from HRM analysis indicating *NTHL1* mutations in exon 2.

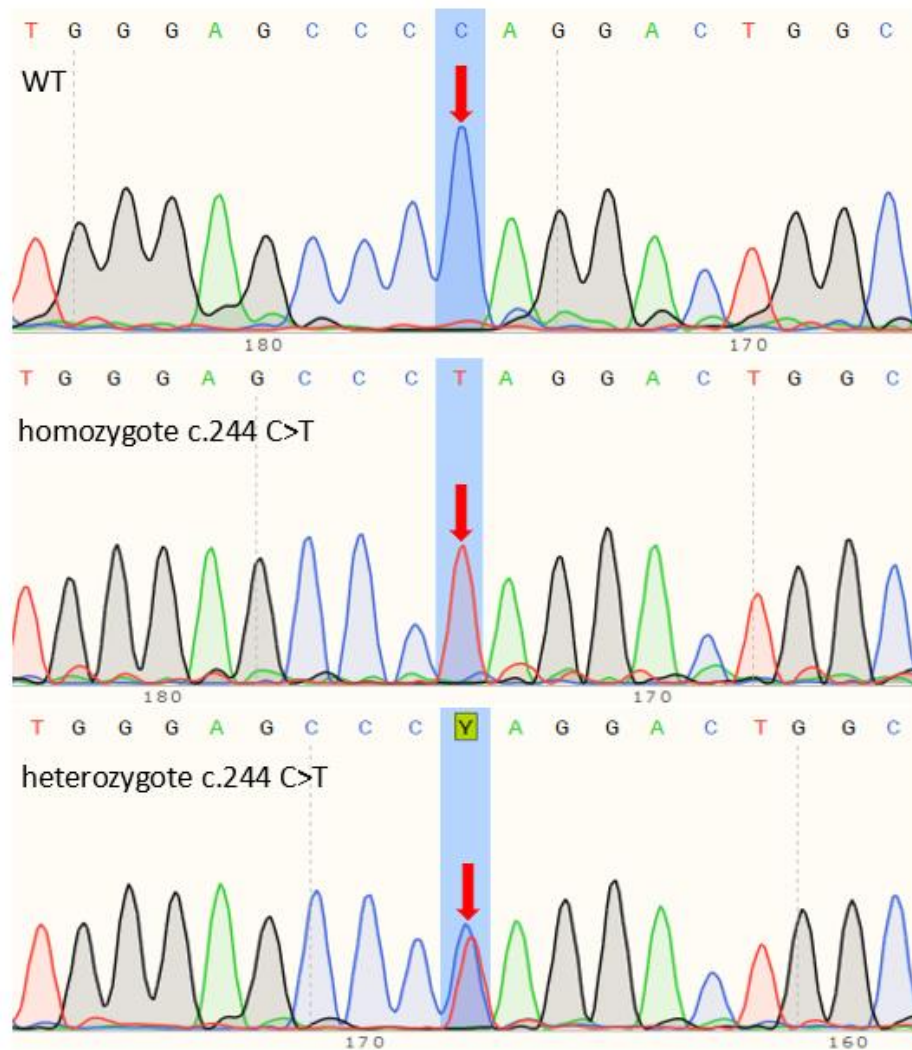

**Figure S2.** Sequencing chromatograms demonstrating c.244 C>T mutations in the homozygous and heterozygous state compared to wild type in the *NTHL1* gene.

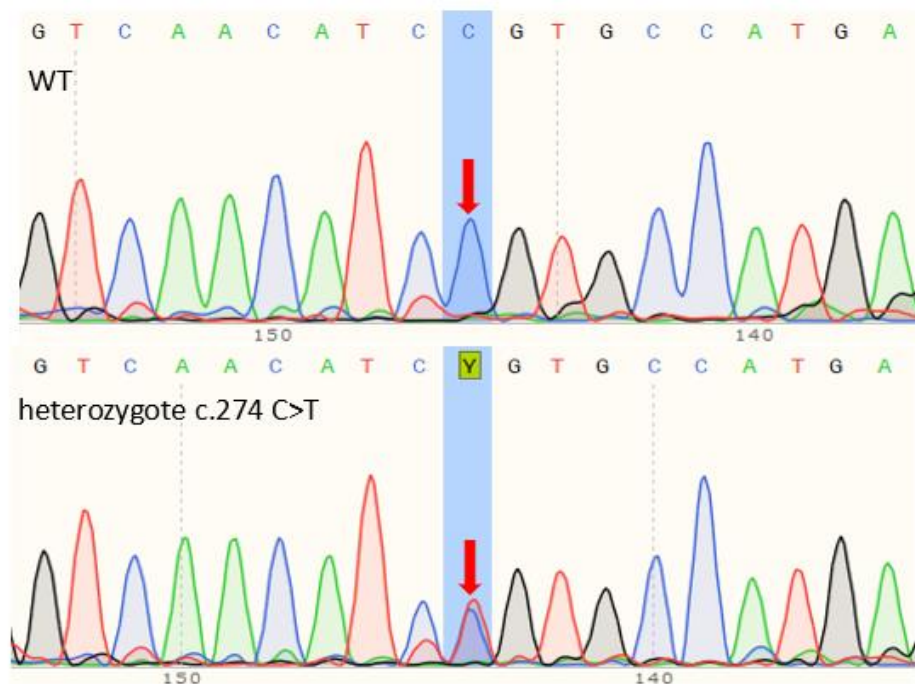

**Figure S3.** Sequencing chromatograms demonstrating c.274 C>T mutation in the heterozygous state compared to wild type in the *NTHL1* gene.

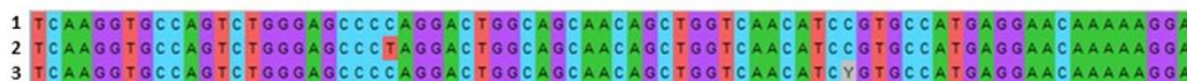

**Figure S4.** Result of multiple sequence alignment of *NTHL1* variants.  
1 - WT; 2 - homozygote c.244 C>T; 3 - heterozygote c.274 C>T.
